# Supplementary material for: Systematical investigation of in vitro molecular interaction between fluorescent carbon dots and human serum albumin
Source: Royal Society of Chemistry journal article supplement (doi:10.1039/c6ra01386d), 2016-01-01
Supplement: c6ra01386d1.pdf [file c6ra01386d1.pdf]

Electronic Supplementary Information

**Systematical investigation of in vitro molecular interaction  
between fluorescent carbon dots and human serum albumin**

**Shan Huang<sup>a,b</sup>, Hangna Qiu<sup>a</sup>, Jiangning Xie<sup>a</sup>, Chusheng Huang<sup>a</sup>, Wei Su<sup>a</sup>,  
Baoqing Hu<sup>b</sup> and Qi Xiao<sup>a,b,\*</sup>**

<sup>a</sup> *College of Chemistry and Materials Science, Guangxi Teachers Education University, Nanning  
530001, P. R. China*

<sup>b</sup> *Key Laboratory of Beibu Gulf Environment Change and Resources Utilization (Guangxi  
Teachers Education University), Ministry of Education, P. R. China*

\* Corresponding author. Tel.: +86 771 3908065; Fax: +86 771 3908065;  
E-mail address: [qi.xiao@whu.edu.cn](mailto:qi.xiao@whu.edu.cn)

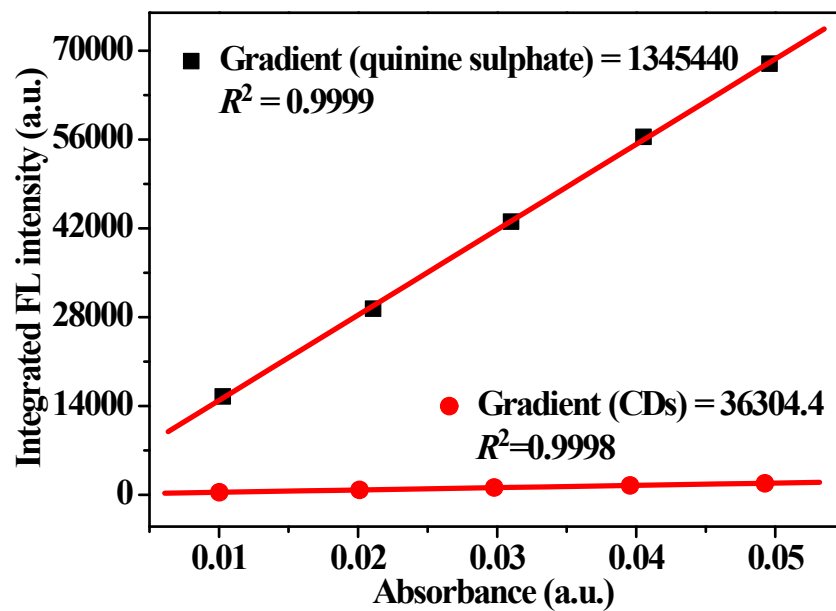

Fig. S1. The relative quantum yield of CDs.

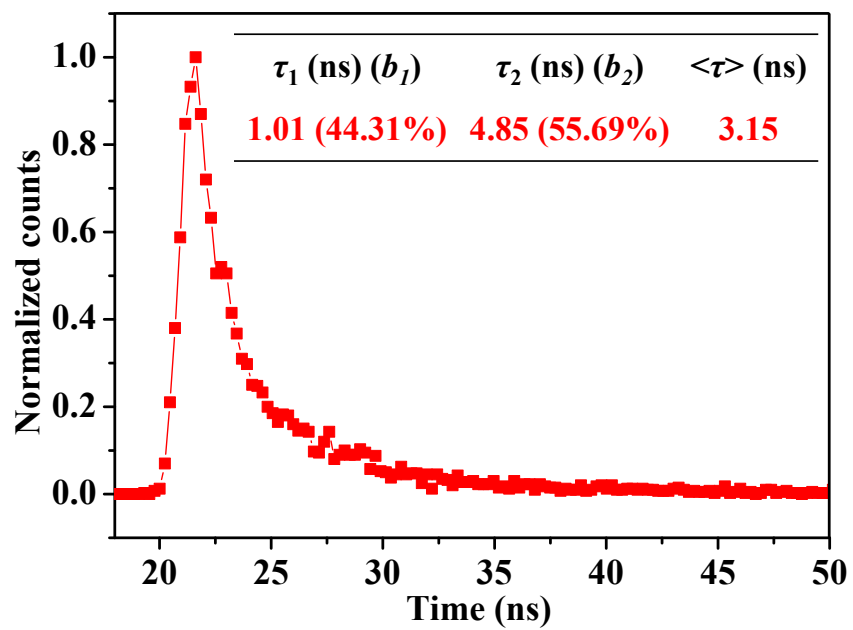

Fig. S2. Fluorescence decay traces of CDs.

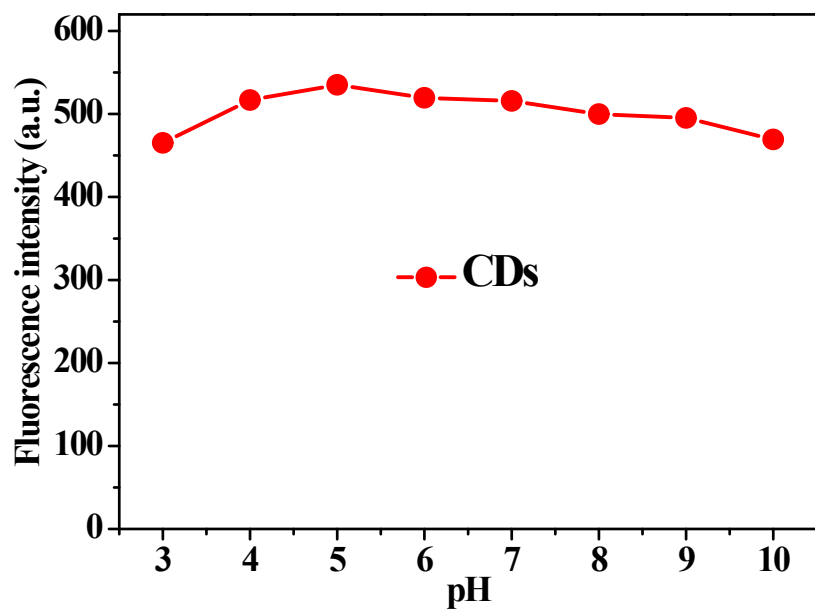

Fig. S3. Influence of pH value on the fluorescence property of CDs.

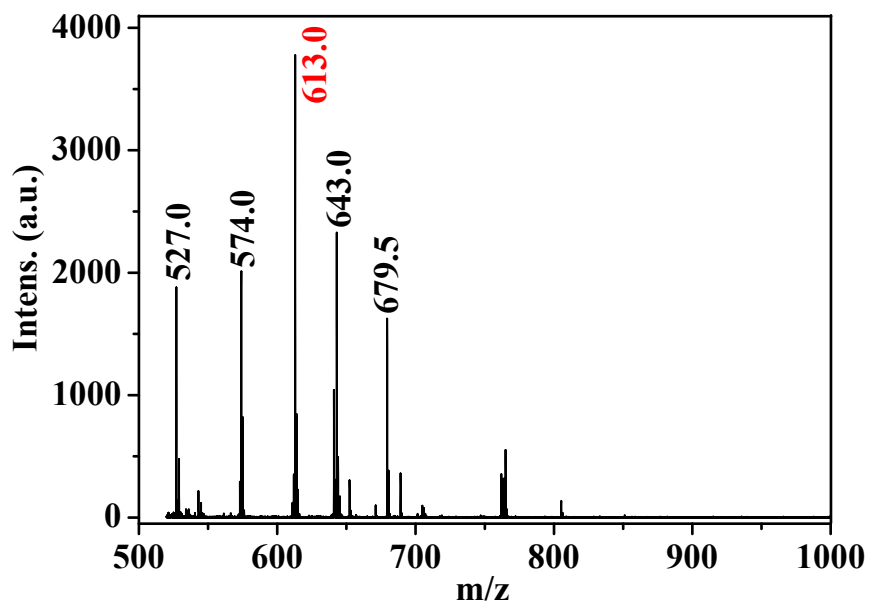

Fig. S4. MALDI-TOF-MS of CDs.

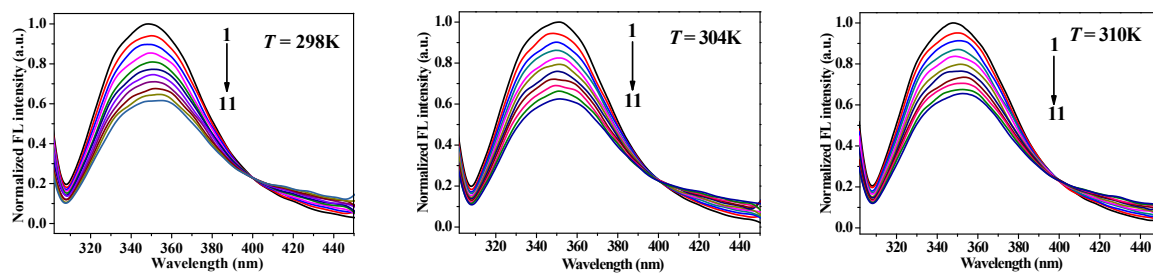

**Fig. S5.** Influences of CDs with different concentrations on the steady-state fluorescence intensity of HSA at 298 K, 304 K and 310 K.

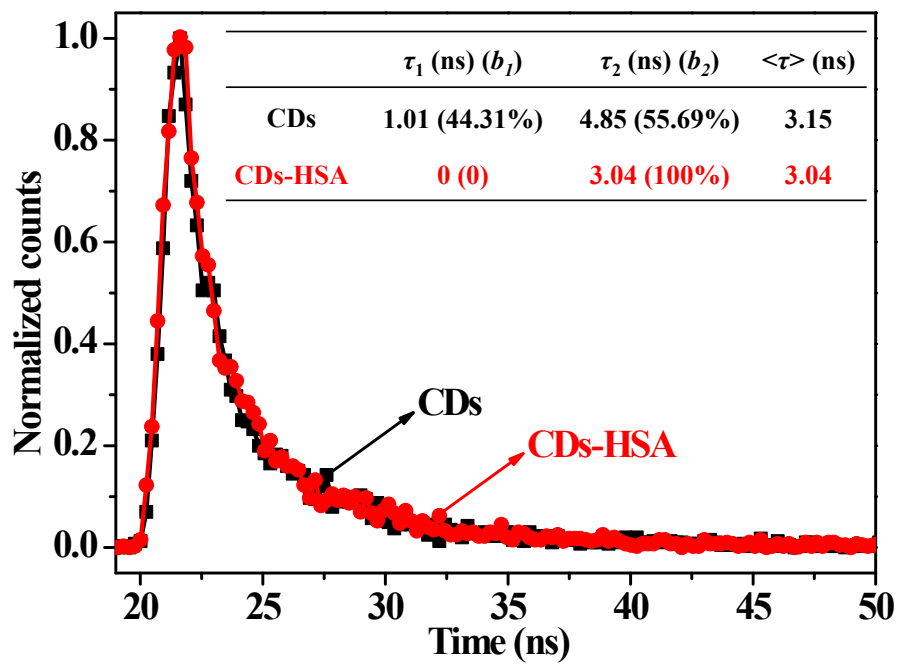

Fig. S6. Fluorescence decay curves of CDs and HSA-CDs system.

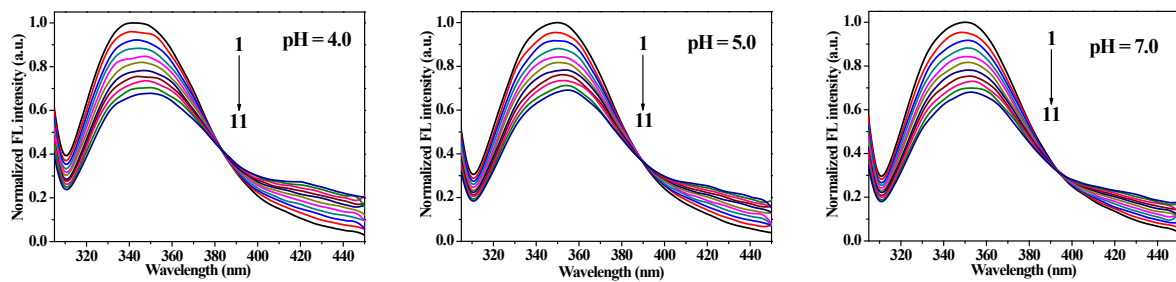

**Fig. S7.** Influences of CDs with different concentrations on the steady-state fluorescence intensity of HSA at three different pH values (pH 4.0, 5.0 and 7.0).



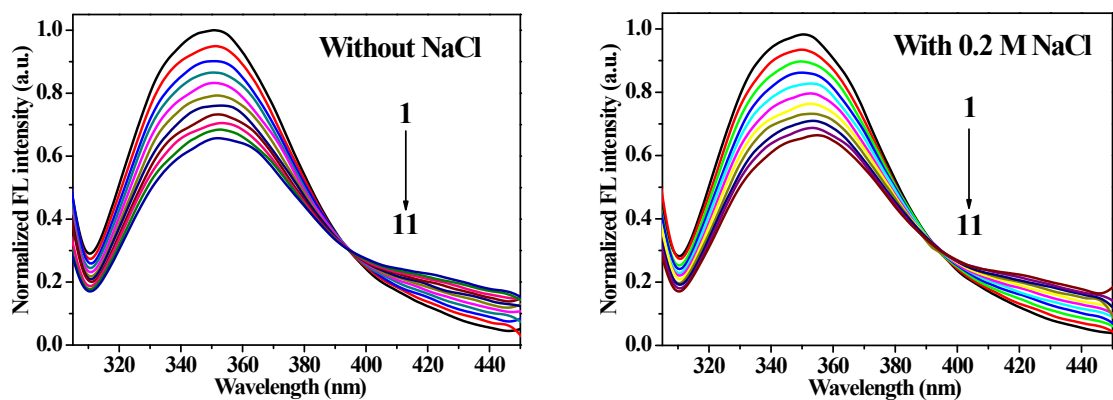

**Fig. S8.** Influences of CDs with different concentrations on the steady-state fluorescence intensity of HSA in the absence and presence of 0.2 M NaCl.

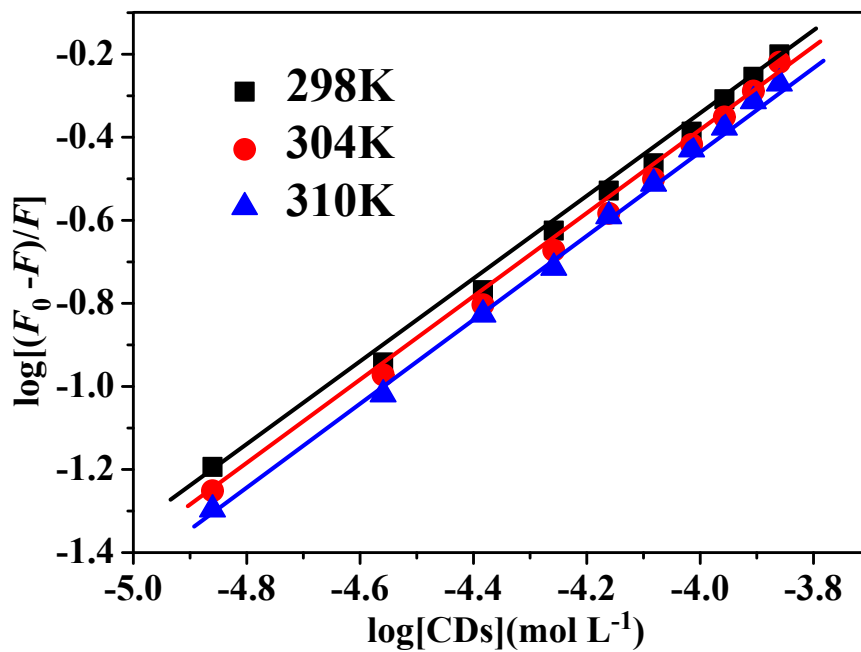

Fig. S9. Plots of  $\log(F_0 - F)/F$  versus  $\log[\text{CDs}]$  for HSA-CDs system at three different temperatures.
